# Supplementary material for: A brief gestalt intervention changes ultrasound measures of tongue movement during breastfeeding: case series
Source: Research Square preprint supplement (doi:10.21203/rs.3.rs-228338/v1), 2021-03-02
Supplement: Supplementary file 1 [file 150409789633be835e93b5c7.docx]

**Table 3 Ultrasound measurements pre- and post-frenotomy case in millimetres (Garbin et al.1)**

| **ULTRASOUND MEASURES** | **GARBIN ET AL Pre and Post-Frenotomy Case 2013 1** |  |  |  |  |  |
| --- | --- | --- | --- | --- | --- | --- |
|  | **Pre TU** | **Pre TD** | **Pre-frenotomy difference between TU and TD** | **Post TU** | **Post TD** | **Post-frenotomy difference between TU and TD** |
| NHSPJD | 10 | 6.1 | Nipple slide 3.9 | 5.7 | 3.9 | Nipple slide 1.8 |
| IOD |  |  |  |  |  |  |
| Nipple and breast tissue dimension (measured at the following distances from nipple tip) |  |  |  |  |  |  |
| 2 | 4.9 | 8.5 | 3.6 | 5.2 | 8.2 | 3.0 |
| 5 | 6.9 | 9 | 2.1 | 6.8 | 10.7 | 3.9 |
| 10 | 9.8 | 10.3 | 0.5 | 8.6 | 12.9 | 4.3 |
| 15 | - | 11.1 |  | 9.5 | 13.7 | 4.2 |
| Av. | 7.2 | 9.7 | 2 | 7.5 | 11.4 | 3.9 |

1. Garbin CP, Sakalidis Vs, Chadwick LM, Whan E, Hartmann PE, Geddes DT. Evidence of improved milk intake after frenotomy: a case report. *Pediatrics*. 2013;132:e1413.
